1 **First description of a *Yersinia pseudotuberculosis* clonal outbreak in France, confirmed**  
2 **using a new core genome multilocus sequence typing method**

3

4 Cyril Savin\*<sup>1,2,3</sup>, Anne-Sophie Le Guern<sup>1,2,3</sup>, Fanny Chereau<sup>4</sup>, Julien Guglielmini<sup>5</sup>, Guillaume  
5 Heuzé<sup>6</sup>, Christian Demeure<sup>1,3</sup>, Javier Pizarro-Cerdá\*<sup>1,2,3</sup>

6

7 Author affiliations

8 <sup>1</sup>Institut Pasteur, Université de Paris Cité, *Yersinia* Research Unit, F-75015, Paris, France

9 <sup>2</sup>Institut Pasteur, Université de Paris Cité, *Yersinia* National Reference Laboratory, F-75015,

10 Paris, France

11 <sup>3</sup>Institut Pasteur, Université de Paris Cité, WHO Collaborating Research & Reference Centre

12 for *Yersinia* FRA-140, F-75015, Paris, France

13 <sup>4</sup>French National Public Health Agency, Department of Infectious Diseases, F-94410, Saint-

14 Maurice, France

15 <sup>5</sup>Institut Pasteur, Université de Paris Cité, Hub de Bioinformatique et Biostatistique, F-75015,

16 Paris, France

17 <sup>6</sup>French National Public Health Agency, Corse, F-20000, Ajaccio, France

18 \* Co-corresponding authors:

19 Cyril Savin & Javier Pizarro-Cerdá

20 Institut Pasteur, *Yersinia* Research unit

21 25-28 rue du Dr Roux, 75724 Paris cedex 15, France

22 Phone : 00-33-1-45-68-83-26

23 E-mail : [cyril.savin@pasteur.fr](mailto:cyril.savin@pasteur.fr), [javier.pizarro-cerda@pasteur.fr](mailto:javier.pizarro-cerda@pasteur.fr)

24 Number of words: 3,539

25

26 **Running Title**

27 French *Yersinia pseudotuberculosis* clonal outbreak

28 **Keywords**

29 *Yersinia pseudotuberculosis*, outbreak, epidemiological investigation, cgMLST, enteric

30 yersiniosis

31 **Abstract (150 words)**

32 *Yersinia pseudotuberculosis* is an enteric pathogen causing mild enteritis that can lead to  
33 mesenteric adenitis and septicemia in elderly patients. Most cases are sporadic, but outbreaks  
34 have already been described in different countries. We report for the first time a *Y.*  
35 *pseudotuberculosis* clonal outbreak in France, that occurred in 2020. An epidemiological  
36 investigation pointed towards the consumption of tomatoes as the likely source of  
37 contamination. The *Yersinia* National Reference Laboratory (YNRL) developed a new  
38 cgMLST scheme with 1,921 genes specific to *Y. pseudotuberculosis* that identified the  
39 clustering of isolates associated to the outbreak and allowed to perform molecular typing in  
40 real time. In addition, this method allowed to retrospectively identify isolates belonging to this  
41 cluster from earlier in 2020. This method, which does not require specific bioinformatic skills,  
42 is now used systematically at the YNRL and proves to display an excellent discriminatory  
43 power and is available to the scientific community.

## 44 **Introduction**

45           The *Yersinia* genus encompasses 26 different species. Two of them are  
46 enteropathogenic for humans: *Yersinia enterocolitica* and *Yersinia pseudotuberculosis* (1).  
47 Occurring predominantly in children, this latter species can cause mild enteritis characterized  
48 by fever, abdominal pain, and sometimes diarrhea that can lead to mesenteric adenitis (2). *Y.*  
49 *pseudotuberculosis* (*Yptb*) can cause an invasive infection, leading to bacteremia in elderly  
50 patients or in individuals presenting underlying medical disorders (diabetes, cirrhosis, iron  
51 overload) (3). Most of the *Yptb* associated-cases are sporadic, but some outbreaks have been  
52 reported in different parts of the world, including Japan (4), Canada (5), Europe (6), Russia  
53 (7) and more recently in New Zealand (8). The reservoir of *Yptb* is mostly wild mammals  
54 (particularly rodents, lagomorphs, wild boars) and birds. The pathogen can enter the food  
55 chain and outbreaks caused by consumption of contaminated iceberg lettuce (9), carrots (10)  
56 or raw milk (11) have been described.

57           In case of outbreak suspicion, epidemiological investigations are of key importance to  
58 establish a link between patients and to identify a common exposure. Molecular investigation  
59 methods allowing the establishment of a genetic link between bacterial isolates have been  
60 essential in many outbreak investigations to confirm a genetic link between clinical isolates or  
61 between clinical and environmental isolates. Pulsed-field gel electrophoresis (PFGE) used to  
62 be the gold standard technique (9). However, this method is time-consuming and labor-  
63 intensive. Its lack of reproducibility and resolution led to its replacement by multilocus  
64 variable-number tandem repeat analysis (MLVA) which has a better discriminatory power,  
65 but is still time-consuming (12). Recent advances in sequencing methods have made whole-  
66 genome sequencing a rapid and affordable approach, available to surveillance laboratories.  
67 This has led to the development of core-genome Single Nucleotide Polymorphism (cgSNP)  
68 analyses to determine the genetic distance between bacterial isolates, with an excellent

69 discriminatory power (8, 13). Nevertheless, cgSNP analyses require advanced bioinformatic  
70 skills and is not yet standardized between laboratories.

71           In France, the surveillance of enteric yersiniosis is conducted by the *Yersinia* National  
72 Reference Laboratory (YNRL) and Santé publique France (SpF), the national public health  
73 agency. The routine procedure at the YNRL includes whole-genome sequencing of all  
74 bacterial isolates, followed by a bioinformatic analysis using a 500-gene core genome  
75 multilocus sequence typing (cgMLST) dedicated to the *Yersinia* genus (14), which allows to  
76 identify the species and eventually the lineage. Due to its relative low number of genes, this  
77 technique is not used to detect clusters. Therefore, the YNRL developed a new and easy-to-  
78 use public tool for their identification. This method is as powerful as other bioinformatic tools  
79 based on whole-genome sequencing such as cgSNP analysis and does not require specific  
80 bioinformatic skills. It is based on a cgMLST of 1,921 genes shared by most *Yptb* strains. We  
81 hereby describe this tool and highlight its usefulness in the investigation of the first described  
82 *Yptb* outbreak in France.

83

## 84 **Methods**

### 85 ***Y. pseudotuberculosis* isolates and taxonomic assignment**

86 *Yersinia* isolates, together with some clinical and demographic data, are regularly sent  
87 to the French YNRL for enteric yersiniosis by medical laboratories for complete  
88 characterization. Isolation and taxonomic assignments are performed as described by Savin *et*  
89 *al.* (14) based on a 500-gene cgMLST scheme designed to identify all the species of the  
90 *Yersinia* genus, as well as the lineage. A total of 359 isolates of *Yptb* received at the YNRL  
91 between 1991 and 2020 for complete characterization were genotypically assigned. In  
92 addition, genomic data of 9 isolates of *Yptb* lineage 16 with a clinical origin (1969 to 1990)  
93 were extracted from our database for comparison of their genetic relatedness.

### 94 **A novel cgMLST as a tool for identification of *Y. pseudotuberculosis* clusters**

95 From our 1,346 *Yersinia* reference genomes dataset, constituted for the phylogenetic  
96 analysis of the *Yersinia* genus (14), 485 genomes representative of the *Yptb* species diversity  
97 were selected. Selection of the genes was performed as described previously (14) and led to  
98 the selection of 1,421 *Yptb* core genes to which the 500 genes of the *Yersinia* spp cgMLST  
99 scheme (14) were added, resulting in 1,921 core genes deemed suitable for cgMLST analysis  
100 and molecular investigation (Table S1).

101 A database was created for *Yptb* in the Institut Pasteur's MLST and whole-genome  
102 MLST resource (<https://bigsd.bpasteur.fr>), which uses the BIGSdb software tool (15, 16). All  
103 *de novo* assembled genomes were uploaded into the isolates database, and the reference  
104 alleles of the 1,921 cgMLST loci were defined in the linked database of reference sequences  
105 and profiles ('seqdef'). Within BIGSdb, a scan of the genome sequence was performed for  
106 each isolate using parameters (min 80% identity, min 80% alignment, blastn word size of 20  
107 nt) to check for the presence of each core gene and to determine its allele number. The  
108 BIGSdb –

109 *Yptb* database of cgMLST profiles is accessible at <https://bigsd.b.pasteur.fr/yersinia/>. A  
110 comparison of the allelic profiles can be performed either with the ‘Genome comparator’  
111 plugin or by the construction of a minimum spanning tree (MST) with GrapeTree (17) using  
112 the corresponding BIGSdb plugin.

113 Since 2018 at the YNRL, each isolate identified as *Yptb* is also submitted routinely to  
114 this new cgMLST to evaluate its genetic distance with other isolates from the database. When  
115 a cluster of isolates ( $\leq 5$  allelic difference) is identified, the YNRL alerts SpF who determines  
116 whether an epidemiological investigation is required.

### 117 **Core-genome SNP analysis**

118 Genome sequences of all the isolates and paired-end quality-filtered FASTQ files were  
119 obtained as described by Savin *et al.* (14). Variant calling was performed using the IP32953  
120 reference strain (accession number: NC\_006155) with Snippy version 4.6.0 and core-SNPs  
121 were extracted using snp-sites (<https://github.com/tseemann/snippy>). A comparison of the  
122 isolates using the core-SNPs was performed by the construction of a MST with GrapeTree  
123 (17).

### 124 **Discriminatory power determination**

125 The discriminatory power of the molecular typing method was determined using the  
126 Simpson’s index of diversity (ID). It calculates the probability of a technique to attribute the  
127 same profile to epidemiologically unrelated isolates. The higher the index is, the better the  
128 discriminatory power is (18).

### 129 **Epidemiological, trace-back, and environmental investigations**

130 The YNRL alerts SpF of any unusual signal of *Yptb* from the microbiological  
131 surveillance, including clusters, to determine whether an epidemiological investigation is  
132 required. For this outbreak, all patients corresponding to the outbreak case definition were  
133 contacted by SpF and queried about their previous exposition to animals, visits in natural

134 areas (sea, lake, forest, river, farms), drinking water supply and food consumption (dairy  
135 products, meats, fresh vegetables), using a standard trawling questionnaire. The questionnaire  
136 covered the 10 days before the onset of the symptoms. Places of travel (holiday period) were  
137 also recorded. Historical records of tap water quality were verified by the regional Health  
138 Agency (ARS de Corse) and trace-back investigation of suspected foods were performed by  
139 the French Directorate General for Food (DGAI) and the General Directorate for Competition  
140 Policy, Consumer Affairs and Fraud Control (DGCCRF).



## 141 **Results**

### 142 **Historical diversity of *Y. pseudotuberculosis* isolates in France**

143 According to the French YNRL database, among the 324 *Yptb* isolates received  
144 between 1991 and 2019, seventeen lineages currently circulate in France: isolates from  
145 lineages 15 and 10 are the most frequent (76 and 70 isolates respectively), followed by  
146 lineages 17, 5, 7, 2 and 16 (Figure S1). Even if the number of isolates has been quite stable  
147 over time ( $11.2 \pm 5.2$  per year since 1991), very few strains were reported in 1997 and 2002 (2  
148 isolates each year) while a peak was observed in 2005 (28 isolates) (Figure S1).

### 149 **Suspicion of a *Y. pseudotuberculosis* outbreak in France during 2020**

150 In 2020, enteric yersiniosis surveillance by the YNRL led to the identification of 35  
151 isolates of *Yptb*. Their geographical distribution indicates that, for almost all the lineages,  
152 isolates originated from different French departments (Figure 1.A). The 20 ones identified in  
153 the first semester belonged to 9 different lineages, lineage 10 being the most frequently  
154 isolated (5 isolates) whereas 3 specimens of each lineage 15 and 16 were found (Figure 1.B).  
155 At the end of July, 3 additional lineage 16 isolates were identified. The isolation of these  
156 specimens by a single medical laboratory in Porto-Vecchio (Corse-du-Sud) led the YNRL to  
157 alert SpF (see below) of a potential outbreak concerning *Yptb* lineage 16 (Figure S2). In  
158 August 2020, 4 more lineage 16 isolates were identified, from the same laboratory, together  
159 with 3 other isolates (lineage 10 and 15). In September 2020, 2 lineage 16 isolates were  
160 identified but they originated from a laboratory located in Lyon (Rhône). Afterwards, no more  
161 isolates from lineage 16 were reported in 2020. Interestingly, in addition to the 8 lineage 16  
162 isolates identified during the summer, 3 lineage 16 specimens were found, 2 by the same  
163 laboratory in Corse-du-Sud, and one in Dijon (Côte d'Or) at the beginning of the year.  
164 Whereas no *Yptb* were identified in October and November, 4 isolates belonging to 3 different  
165 lineages (7, 10 and 15) appeared in December (Figure S2).

## 166 **Epidemiological, trace back and environmental investigations**

167           On August 12, 2020, the YNRL informed SpF of the identification of 3 patients  
168 infected by *Yptb* lineage 16 as determined by a cgMLST 500 genes, isolated in the same week  
169 (week 30) in a single medical laboratory in Corsica (Figure S2). By comparison, 0 to 2  
170 isolates belonging to lineage 16 had been isolated per year in France since 1991 (Figure S1).  
171 Moreover, no *Yptb* had been isolated the previous years by the medical laboratory, while  
172 already using the same identification method. This unusual temporal and geographical group  
173 of cases, combined with the potential for invasive infections by *Yptb*, instigated an  
174 epidemiological investigation led by SpF and local public health authorities, to identify a  
175 potential common source of contamination and to implement control measures.

176           Cases were defined as any patient with identification of a *Yptb* lineage 16 isolate in the  
177 YNRL national database, from any type of specimen sampled from July 1<sup>st</sup> in metropolitan  
178 France. In total, 8 cases were identified with sampling dates between July 23<sup>rd</sup> and September  
179 1<sup>st</sup>. The 8 *Yptb* specimens were recovered from stool samples in a laboratory in Porto-Vecchio  
180 (Corse-du-Sud department) for 6 patients and in a laboratory in Lyon (Rhône department) for  
181 2 patients. The median age of the patients was 25 years old, with 4 patients between 5 to 15, 3  
182 patients between 30 to 60 and 1 patient older than 90. The patients sex ratio was 1.7 (three  
183 women and five men). The 8 cases were interviewed: the onset of the symptoms covered a  
184 period from July 10<sup>th</sup> to August 26<sup>th</sup>. Most patients have managed their symptoms at home,  
185 one 10-year-old child was admitted to the hospital during one night for observation. Two  
186 patients were residents of Corsica and 6 were in holidays in Corsica during the incubation  
187 period. Moreover, 7 of them were located (residency or holidays) in a 10km radius area in  
188 Northeast of Corsica (Haute-Corse department).

189           Food queries pointed towards the consumption of tomatoes from the same grocery  
190 store in Northeast of Corsica (6 cases). No other common consumption of food nor leisure

191 activity was identified. Seven of the cases resided in an area supplied by the same water  
192 distribution network. No contamination episodes of the water distribution network covering  
193 the area were identified in the historical records (15 campaigns in 2019).

194 Food investigation established that the suspected tomatoes originated from a local  
195 production unit, based in the same geographical area. On-site inspection did not identify any  
196 non-conformity potentially leading to contamination of the tomatoes during production,  
197 harvest, storage, packaging, or transport, nor any problem with traceability. Three other  
198 companies commercialized tomatoes from the suspected batch, but no trace back could be  
199 performed as no sales records were kept. The tomatoes were not rinsed before distribution and  
200 the water used for irrigation came from the public distribution network for agricultural use.  
201 No verification of the quality of this water system was conducted.

#### 202 **A new *Y. pseudotuberculosis* cgMLST confirmed the cluster of isolates**

203 As our newly developed 1,921 genes cgMLST scheme specific to the species *Yptb* is  
204 used in routine at the YNRL, identification of the cluster of isolates associated to this  
205 pseudotuberculosis outbreak was possible. This new typing method was also applied to the  
206 *Yptb* strains isolated in France in 2020 and their genetic relatedness was determined (Table S2  
207 and Figure 2).

208 The observed distance between isolates within each lineage (0 to 140 alleles) is much  
209 lower than distances observed between isolates from different lineages (269 to 1267 alleles),  
210 confirming that the lineages are well demarcated from each other using this novel cgMLST  
211 (Figure 2).

212 Whereas the distances between isolates from lineages 10 and 15 are higher, lineages 7  
213 and 16 display isolates more closely related to each other, suggesting more clonality. Lineage  
214 7 isolates (4 specimens) have 1 to 3 allele differences and may be considered belonging to the  
215 same cluster. However, no interviews of these patients were conducted to identify a potential

216 common exposure and their distant isolation dates (Figure 1 and 2) weaken the hypothesis of  
217 a common source of contamination.

218 Interestingly, among the 11 lineage 16 isolates, 10 of them showed close genetic  
219 relatedness (between 0 and 3 differences) and may be considered as belonging to the same  
220 cluster. Whereas isolates IP43304 and IP43492 were recovered at the beginning of 2020, the 8  
221 other specimens were isolated within 38 days (from 28<sup>th</sup> of July to 3<sup>rd</sup> of September 2020) and  
222 correspond to the cases investigated during the summer (see above). The close genetic  
223 relatedness of the 8 isolates, together with their close geographical and temporal isolation,  
224 confirmed a cluster of cases due to a *Yptb* lineage 16 infection. Interestingly, the 2 isolates  
225 IP43304 and IP43492 were also recovered from the laboratory in Porto-Vecchio in February  
226 and March 2020. No interviews of these two patients from early 2020 on the exposures were  
227 conducted, given the distance to onset of symptoms. The high allele difference number  
228 between isolate IP43278 and the other isolates ( $\geq 140$ ) from lineage 16 (Figure 2) excludes  
229 IP43278 from the cluster.

### 230 **Performance comparison between the novel *Y. pseudotuberculosis* cgMLST and classical** 231 **cgSNP analysis**

232 Taking advantage of our novel, easy-to-use *Yptb* cgMLST scheme, we compared the  
233 performance of both methods on 39 lineage-16 clinical isolates from our French database  
234 (1969 – 2020). Minimum spanning trees (MST) were reconstructed with both cgMLST data  
235 and cgSNP analyses (Figure 3).

236 cgMLST-based MST allows to determine the genetic distance in terms of allelic  
237 distance. Among the 39 studied isolates, 37 cgMLST profiles were identified. Only 3 isolates  
238 belonged to the same cgMLST profile, and they corresponded to specimens from the 2020  
239 Corsica outbreak (Figure 3.A). Pairwise allelic distances between the 39 isolates (table S3)

240 confirm that 3 isolates have the same cgMLST profile (IP43304, IP43952 and IP44154)  
241 whereas other isolates have allelic distances between 1 and 157 (table S3).

242 The cgSNP-based MST (Figure 3.B) allows to determine the genetic distance in terms  
243 of point mutations (SNPs). On this tree, we can observe 31 different SNP profiles: 2 isolates  
244 from 2005 have the same SNP profile and 8 isolates (IP43304, IP43951, IP43952, IP43989,  
245 IP44094, IP44110, IP44154 and IP44180) from the 2020 outbreak have the same profile.  
246 Pairwise SNP comparisons (Table S3) confirm the null distance between those isolates,  
247 whereas other isolates have between 1 and 802 SNP distances.

248 This lower number of profiles obtained with the cgSNP-based MST indicates that  
249 some of the isolates with different cgMLST profiles have merged into a single cgSNP profile.  
250 Simpson's index of diversity estimation for cgMLST is 0.996, whereas for cgSNP analysis is  
251 0.96. Our cgMLST proved to have a better discriminatory power than cgSNP.

## 252 **Discussion**

253           We report here for the first time a *Yptb* clonal outbreak in France, with 8 cases  
254 identified during the summer 2020. All cases had been exposed in the same area in Corsica  
255 and consumption of local tomatoes was the suspected source of contamination. A new  
256 cgMLST confirmed that the 8 cases belonged to the same cluster. Moreover, two earlier cases  
257 (February and March 2020, both detected in Corsica) were also identified as belonging to the  
258 same cluster (although they could not be interviewed on their exposures and no common  
259 exposure with the summer cases could be identified).

260           The number of cases reported during the outbreak is low. However, incidence of  
261 pseudotuberculosis is also low in France, with an average number of 11 isolates per year  
262 (Figure S1). This incidence is probably underestimated: all symptomatic patients do not visit  
263 their doctor and they rarely prescribe stool examinations in case of diarrhea with no  
264 complications. In addition, notification of *Yptb* or transmission of the isolates to the YNRL  
265 are not mandatory. Furthermore, detection and isolation of *Yptb* in medical laboratories is  
266 difficult: a slower growth rate as compared to other enterobacteria and the presence of  
267 competitive microbiota renders *Yersinia* spp. isolation complex (19, 20). Growth of some  
268 *Yptb* strains is impaired on semi-selective CIN agar (21). The recent implementation of panel-  
269 based testing systems (i.e. multiplex PCR) targeting enterobacteria could alleviate this issue,  
270 leading to stool culture only when a PCR positive signal is obtained (22, 23). However, some  
271 PCR kits target only *Y. enterocolitica* specific chromosomal genes, reinforcing the low  
272 identification rate of *Yptb*.

273           Epidemiological investigation pointed tomatoes as the suspected source of  
274 contamination source for the summer cases. However, as no sampling of tomatoes was  
275 performed, this suspected source could not be confirmed. Contaminated vegetables were also  
276 suspected in previously reported *Yptb* outbreaks, with iceberg lettuce in 1998 (9) and carrots

277 in 2006 (10) in Finland were confirmed as sources of contamination. As wildlife is considered  
278 the *Yptb* reservoir, feces of carrier animals may contaminate environmental water, soil, and  
279 grass (24). Contamination of vegetables in the fields can be direct (feces) or indirect  
280 (irrigation with contaminated water). Wild boars and pigs are recognized as reservoirs of *Yptb*  
281 (25): as Corsica hosts a large population of wild boars and allows the wandering of pigs, it is  
282 possible to hypothesize a contamination of vegetables in the fields from this reservoir. Wild  
283 rodents may also contaminate vegetables in the fields or during storage. Carrier animals may  
284 contaminate their environment as long as they host the pathogen, possibly leading to several  
285 episodes or sources of contamination (26).

286 An increase in *Yptb* cases had been observed and investigated in 2005 in France  
287 (Figure S1 and 1). However, the epidemiological investigation identified a high genetic  
288 diversity in the isolates as well as the absence of a geographically defined cluster. This  
289 increase in clinical cases has been linked to an increase in prevalence in rodent reservoirs (3).

290 Identification of outbreak-related isolates and trace-back investigations to identify a  
291 potential source of contamination were difficult when techniques such as PFGE (9) or MLVA  
292 (12) were used. Depending on the pathogen, the discriminatory power of PFGE may differ  
293 and not be optimal (27-29) and its lack of reproducibility between laboratories restricts its use  
294 to retrospective epidemiology (30, 31). PFGE has often been replaced by MLVA, which has  
295 proven to display a better discriminatory power (29, 32) but is still labor-intensive and time-  
296 consuming. Development of whole-genome-based typing methods alleviates these issues and  
297 allows rapid detection of clusters as well near-real time alerts of public health authorities. The  
298 confirmation of genetic relatedness of clinical and food samples remains a strong lever for  
299 recalling food products from the market. Rapid trace-back investigation strengthens the  
300 possibility to identify a common source of contamination and to remove it from the food  
301 chain (33).

302 Different cgMLST schemes have been developed for foodborne pathogen  
303 identification. They have proven to be useful in public health surveillance and have provided  
304 tools allowing international collaboration (13, 34, 35). Discriminatory power comparisons  
305 between cgMLST and cgSNP analysis have shown a very high discriminatory power for both  
306 methods, thus arguing for the use of whole-genome-based methods for epidemiological  
307 investigation (Figure 3) (13). The comparison confirmed the better performance and  
308 resolution power of our novel cgMLST specific to *Yptb*. cgSNP analysis has already been  
309 used in the investigation of an outbreak due to *Yptb* infection. This tool allowed the  
310 identification of a point-source contamination in the food chain (8). However, it requires  
311 advanced bioinformatic skills not widely available in National Reference laboratories  
312 worldwide. In this framework, we developed a new cgMLST for *Yptb* that proved to be more  
313 discriminant than cgSNP analysis (Figure 3 and Table S2). Here, allelic distance identification  
314 was very useful as it confirms that the 8 summer isolates belong to the same cluster with 0 to  
315 3 alleles difference and suggests a persistent or recurrent contamination of the food chain as 2  
316 isolates were identified in February and March 2020. Interestingly, lineage 16 specimens are  
317 absent in previous years samplings (Figure 3.A) suggesting that this clone emerged recently.

318 Our new cgMLST does not require additional laboratory manipulation and is usable in  
319 real-time after the identification of the bacterial species, as it only requires the genome  
320 assembly of the isolate. Furthermore, it relies on the simple comparison of allelic profiles and  
321 should help future international collaboration to determine whether a clone is circulating in  
322 several countries.

323 We report, for the first time in France, an outbreak of *Yptb* infections due to the same  
324 clone. Epidemiological and microbiological investigations established a link between the  
325 patients and identified the consumption of tomatoes from a unique grocery store as the  
326 suspected source of contamination. Our recently developed cgMLST (available for the



327 community at <https://bigsdb.pasteur.fr/yersinia/>) exhibits an excellent discriminatory power  
328 and allows epidemiological investigation in real-time.

329

330 **Acknowledgements**

331           This project received funding from Santé publique France (Saint-Maurice, France) and  
332 the LabEX Integrative Biology of Emerging Infectious Diseases (ANR LBX-62 IBEID). This  
333 work used the computational and storage services (MAESTRO cluster) provided by the IT  
334 department at the Institut Pasteur, Paris. We acknowledge the continuous support of Keith  
335 Jolley (Oxford University) for the development of the BIGSdb web application.

336 **References**

- 337 1. Le Guern AS, Savin C, Angermeier H, Bremont S, Clermont D, Muhle E, et al.  
338 *Yersinia artesianae* sp. nov., *Yersinia proxima* sp. nov., *Yersinia alsatica* sp. nov., *Yersinia*  
339 *vastinensis* sp. nov., *Yersinia thracica* sp. nov. and *Yersinia occitanica* sp. nov., isolated from  
340 humans and animals. *Int J Syst Evol Microbiol*. 2020 Oct;70(10):5363-72.
- 341 2. Terti R, Vuento R, Mikkola P, Granfors K, Makela AL, Toivanen A. Clinical  
342 manifestations of *Yersinia pseudotuberculosis* infection in children. *Eur J Clin Microbiol*  
343 *Infect Dis*. 1989 Jul;8(7):587-91.
- 344 3. Vincent P, Leclercq A, Martin L, Yersinia Surveillance N, Duez JM, Simonet M, et al.  
345 Sudden onset of pseudotuberculosis in humans, France, 2004-05. *Emerg Infect Dis*. 2008  
346 Jul;14(7):1119-22.
- 347 4. Inoue M, Nakashima H, Ueba O, Ishida T, Date H, Kobashi S, et al. Community  
348 outbreak of *Yersinia pseudotuberculosis*. *Microbiol Immunol*. 1984;28(8):883-91.
- 349 5. Nowgesic E, Fyfe M, Hockin J, King A, Ng H, Paccagnella A, et al. Outbreak of  
350 *Yersinia pseudotuberculosis* in British Columbia--November 1998. *Can Commun Dis Rep*.  
351 1999 Jun 1;25(11):97-100.
- 352 6. Jalava K, Hallanvuori S, Nakari UM, Ruutu P, Kela E, Heinasmaki T, et al. Multiple  
353 outbreaks of *Yersinia pseudotuberculosis* infections in Finland. *J Clin Microbiol*. 2004  
354 Jun;42(6):2789-91.
- 355 7. Somova LM, Antonenko FF, Timchenko NF, Lyapun IN. Far Eastern Scarlet-Like  
356 Fever is a Special Clinical and Epidemic Manifestation of *Yersinia pseudotuberculosis*  
357 Infection in Russia. *Pathogens*. 2020 Jun 2;9(6).
- 358 8. Williamson DA, Baines SL, Carter GP, da Silva AG, Ren X, Sherwood J, et al.  
359 Genomic Insights into a Sustained National Outbreak of *Yersinia pseudotuberculosis*.  
360 *Genome Biol Evol*. 2016 Dec 1;8(12):3806-14.

- 361 9. Nuorti JP, Niskanen T, Hallanvuo S, Mikkola J, Kela E, Hatakka M, et al. A  
362 widespread outbreak of *Yersinia pseudotuberculosis* O:3 infection from iceberg lettuce. J  
363 Infect Dis. 2004 Mar 1;189(5):766-74.
- 364 10. Rimhanen-Finne R, Niskanen T, Hallanvuo S, Makary P, Haukka K, Pajunen S, et al.  
365 *Yersinia pseudotuberculosis* causing a large outbreak associated with carrots in Finland, 2006.  
366 Epidemiol Infect. 2009 Mar;137(3):342-7.
- 367 11. Parn T, Hallanvuo S, Salmenlinna S, Pihlajasaari A, Heikkinen S, Telkki-Nykanen H,  
368 et al. Outbreak of *Yersinia pseudotuberculosis* O:1 infection associated with raw milk  
369 consumption, Finland, spring 2014. Euro Surveill. 2015;20(40).
- 370 12. Halkilahti J, Haukka K, Siitonen A. Genotyping of outbreak-associated and sporadic  
371 *Yersinia pseudotuberculosis* strains by novel multilocus variable-number tandem repeat  
372 analysis (MLVA). J Microbiol Meth. 2013 Nov;95(2):245-50.
- 373 13. Vincent C, Usongo V, Berry C, Tremblay DM, Moineau S, Yousfi K, et al.  
374 Comparison of advanced whole genome sequence-based methods to distinguish strains of  
375 *Salmonella enterica* serovar Heidelberg involved in foodborne outbreaks in Quebec. Food  
376 Microbiol. 2018 Aug;73:99-110.
- 377 14. Savin C, Criscuolo A, Guglielmini J, Le Guern AS, Carniel E, Pizarro-Cerda J, et al.  
378 Genus-wide *Yersinia* core-genome multilocus sequence typing for species identification and  
379 strain characterization. Microb Genom. 2019 Oct;5(10).
- 380 15. Jolley KA, Bray JE, Maiden MCJ. Open-access bacterial population genomics:  
381 BIGSdb software, the PubMLST.org website and their applications. Wellcome Open Res.  
382 2018;3:124.
- 383 16. Jolley KA, Maiden MC. BIGSdb: Scalable analysis of bacterial genome variation at  
384 the population level. BMC Bioinformatics. 2010 Dec 10;11:595.

- 385 17. Zhou Z, Alikhan NF, Sergeant MJ, Luhmann N, Vaz C, Francisco AP, et al.  
386 GrapeTree: visualization of core genomic relationships among 100,000 bacterial pathogens.  
387 Genome Res. 2018 Sep;28(9):1395-404.
- 388 18. Hunter PR, Gaston MA. Numerical index of the discriminatory ability of typing  
389 systems: an application of Simpson's index of diversity. J Clin Microbiol. 1988  
390 Nov;26(11):2465-6.
- 391 19. Schiemann DA, Olson SA. Antagonism by gram-negative bacteria to growth of  
392 *Yersinia enterocolitica* in mixed cultures. Appl Environ Microbiol. 1984 Sep;48(3):539-44.
- 393 20. Tan LK, Ooi PT, Carniel E, Thong KL. Evaluation of a modified Cefsulodin-Irgasan-  
394 Novobiocin agar for isolation of *Yersinia* spp. PLoS One. 2014;9(8):e106329.
- 395 21. Fukushima H, Gomyoda M. Growth of *Yersinia pseudotuberculosis* and *Yersinia*  
396 *enterocolitica* biotype 3B serotype O3 inhibited on cefsulodin-Irgasan-novobiocin agar. J Clin  
397 Microbiol. 1986 Jul;24(1):116-20.
- 398 22. Engberg J, Vejrum LK, Madsen TV, Nielsen XC. Verification of analytical bacterial  
399 spectrum of QIAstat-Dx(R) GI V2 and Novodiag(R) Bacterial GE+ V2-0 diagnostic panels. J  
400 Antimicrob Chemother. 2021 Sep 23;76(Supplement\_3):iii50-iii7.
- 401 23. Schaumburg F, Frobose N, Kock R. A comparison of two multiplex-PCR assays for  
402 the diagnosis of traveller's diarrhoea. BMC Infect Dis. 2021 Feb 16;21(1):181.
- 403 24. Mair NS. Yersiniosis in wildlife and its public health implications. J Wildl Dis. 1973  
404 Jan;9(1):64-71.
- 405 25. Reinhardt M, Hammerl JA, Kunz K, Barac A, Nockler K, Hertwig S. *Yersinia*  
406 *pseudotuberculosis* Prevalence and Diversity in Wild Boars in Northeast Germany. Appl  
407 Environ Microbiol. 2018 Sep 15;84(18).

- 408 26. Backhans A, Fellstrom C, Lambertz ST. Occurrence of pathogenic *Yersinia*  
409 *enterocolitica* and *Yersinia pseudotuberculosis* in small wild rodents. *Epidemiol Infect.* 2011  
410 Aug;139(8):1230-8.
- 411 27. Gilpin BJ, Robson B, Lin S, Hudson JA, Weaver L, Dufour M, et al. The limitations  
412 of pulsed-field gel electrophoresis for analysis of *Yersinia enterocolitica* isolates. *Zoonoses*  
413 *Public Health.* 2014 Sep;61(6):405-10.
- 414 28. Magistrali CF, Cucco L, Pezzotti G, Farneti S, Cambiotti V, Catania S, et al.  
415 Characterisation of *Yersinia pseudotuberculosis* isolated from animals with yersiniosis during  
416 1996-2013 indicates the presence of pathogenic and Far Eastern strains in Italy. *Vet*  
417 *Microbiol.* 2015 Oct 22;180(1-2):161-6.
- 418 29. Sihvonen LM, Toivonen S, Haukka K, Kuusi M, Skurnik M, Siitonen A. Multilocus  
419 variable-number tandem-repeat analysis, pulsed-field gel electrophoresis, and antimicrobial  
420 susceptibility patterns in discrimination of sporadic and outbreak-related strains of *Yersinia*  
421 *enterocolitica*. *BMC Microbiol.* 2011 Feb 25;11:42.
- 422 30. Chiou CS, Wei HL, Yang LC. Comparison of pulsed-field gel electrophoresis and  
423 coagulase gene restriction profile analysis techniques in the molecular typing of  
424 *Staphylococcus aureus*. *J Clin Microbiol.* 2000 Jun;38(6):2186-90.
- 425 31. Zhou H, Liu W, Qin T, Liu C, Ren H. Defining and Evaluating a Core Genome  
426 Multilocus Sequence Typing Scheme for Whole-Genome Sequence-Based Typing of  
427 *Klebsiella pneumoniae*. *Front Microbiol.* 2017;8:371.
- 428 32. Hu Y, Li B, Jin D, Cui Z, Tao X, Zhang B, et al. Comparison of multiple-locus  
429 variable-number tandem-repeat analysis with pulsed-field gel electrophoresis typing of  
430 *Acinetobacter baumannii* in China. *J Clin Microbiol.* 2013 Apr;51(4):1263-8.

- 431 33. Jackson BR, Tarr C, Strain E, Jackson KA, Conrad A, Carleton H, et al.  
432 Implementation of Nationwide Real-time Whole-genome Sequencing to Enhance Listeriosis  
433 Outbreak Detection and Investigation. *Clin Infect Dis*. 2016 Aug 1;63(3):380-6.
- 434 34. Moura A, Criscuolo A, Pouseele H, Maury MM, Leclercq A, Tarr C, et al. Whole  
435 genome-based population biology and epidemiological surveillance of *Listeria*  
436 *monocytogenes*. *Nat Microbiol*. 2016 Oct 10;2:16185.
- 437 35. van den Beld MJC, Reubsaet FAG, Pijnacker R, Harpal A, Kuiling S, Heerkens EM,  
438 et al. A Multifactorial Approach for Surveillance of *Shigella* spp. and Enteroinvasive  
439 *Escherichia coli* Is Important for Detecting (Inter)national Clusters. *Front Microbiol*.  
440 2020;11:564103.

441

442

443

## 444 **Figures**

445 Figure 1: Geographical and temporal distribution of the 35 *Y. pseudotuberculosis* isolated in  
446 France in 2020. (A) Map of France with the departments. Size of the circle depends on the  
447 number of isolates. Colors of the circles depends on the isolates' lineages. (B) Number of  
448 strains per month. Colors of the squares depends on the isolates' lineages.

449 Figure 2: Minimum spanning tree obtained using the allelic profiles of the cgMLST (1921  
450 genes) on the 35 *Y. pseudotuberculosis* isolates in France in 2020. The branch lengths are  
451 based on a logarithmic scale. Numbers close to the branches reveals the alleles differences.  
452 Colors of the circles depends on the isolates' lineages.

453 Figure 3: Minimum spanning tree reconstructed on the 39 *Y. pseudotuberculosis* belonging to  
454 the lineage 16 isolated in France, 1969-2020. (A) MST cgMLST-based (B) MST SNP-based.  
455 The branch lengths are based on a linear scale. Numbers close to the branches reveals the  
456 alleles differences (A) or SNP differences (B). Colors of the circles depends on the isolates'  
457 lineages.

## 458 **Supplemental Material**

459 Table S1: List of the 1,921 genes used for this cgMLST.

460 Table S2: Allelic profiles of the 35 isolates from 2020 in France.

461 Table S3: Pairwise distance matrix cgMLST-based and SNP-based obtained comparing the 39  
462 *Y. pseudotuberculosis* isolates belonging to the lineage 16.

463 Figure S1: Repartition of the different *Y. pseudotuberculosis* lineages in France according to  
464 the year of isolation.

465 Figure S2: Timeline of the lineage 16 isolates during summer 2020. Number between brackets  
466 correspond to the isolation month.



A. Geographical distribution

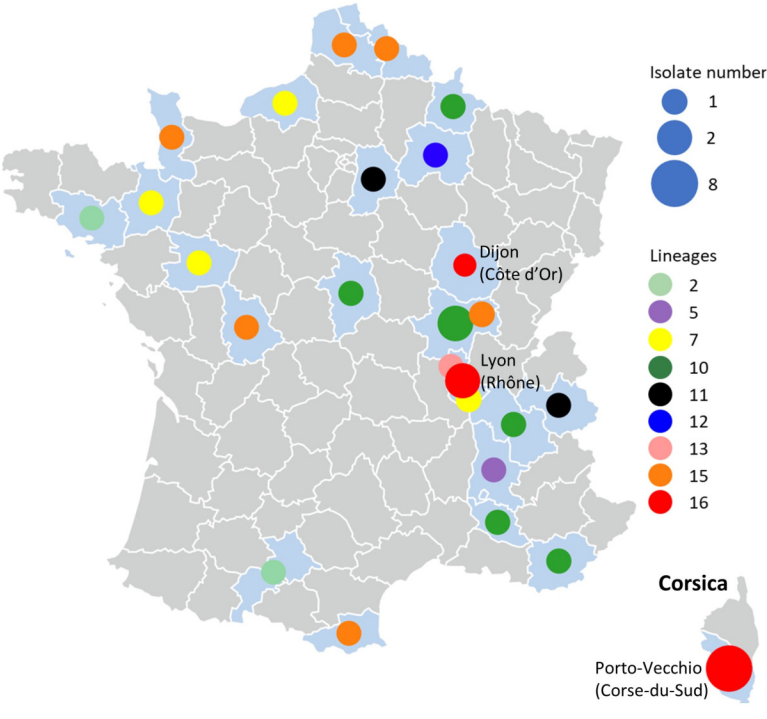

B. Temporal distribution

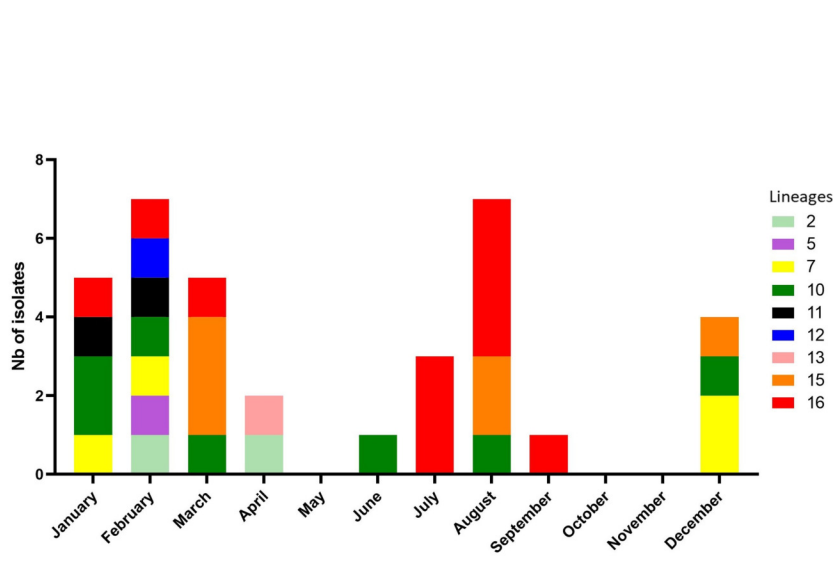

**Lineages**

- 16 [11]
- 10 [7]
- 15 [6]
- 7 [4]
- 11 [2]
- 2 [2]
- 12 [1]
- 13 [1]
- 5 [1]

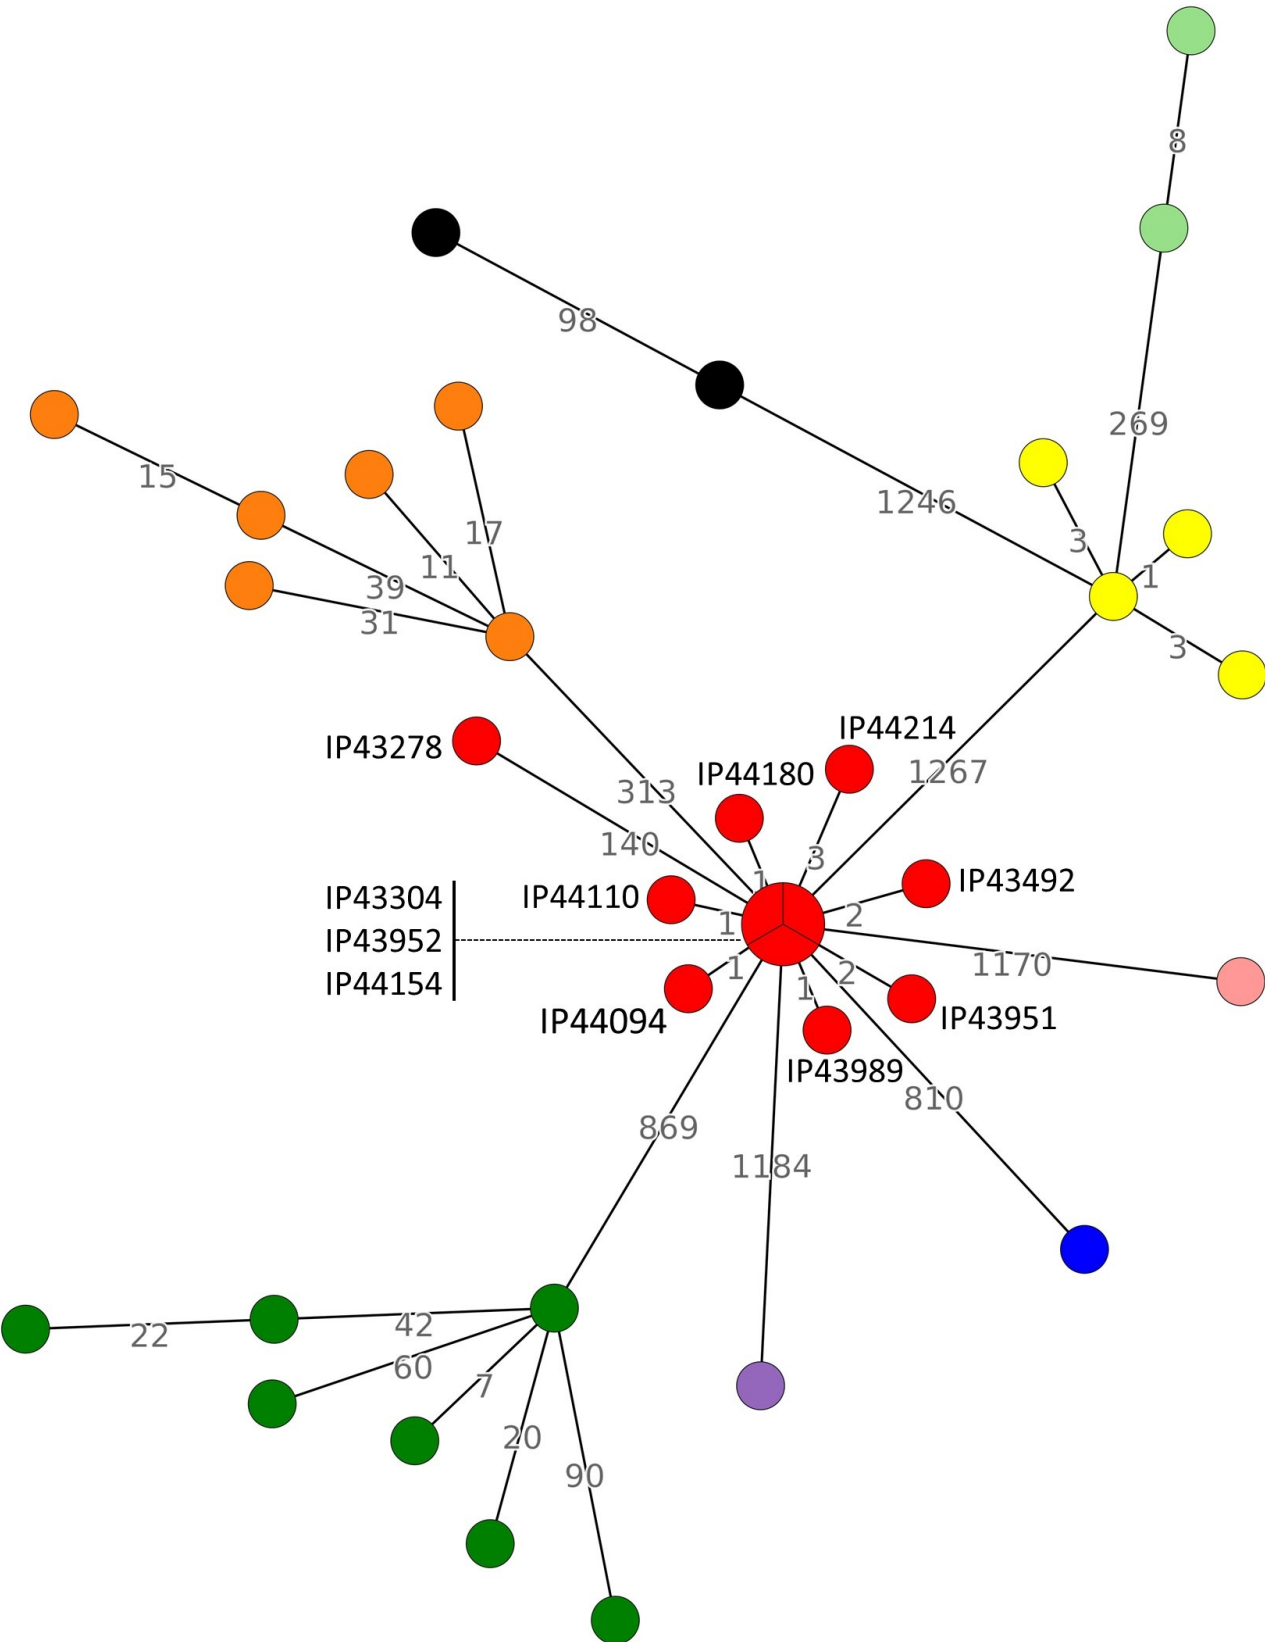

A. MST cgMLST-based on 39 isolates from lineage 16

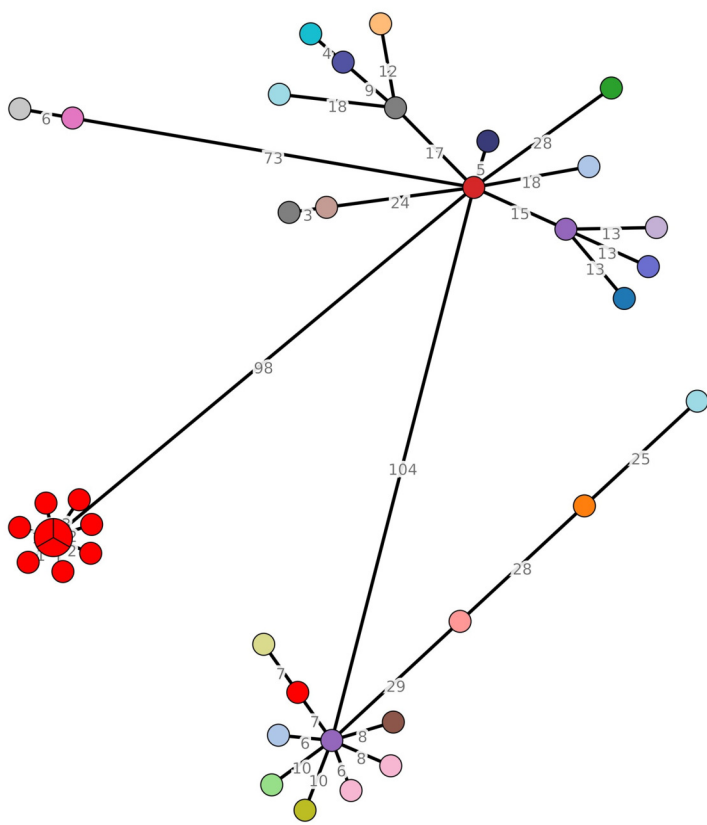

B. MST SNP-based on 39 isolates from lineage 16

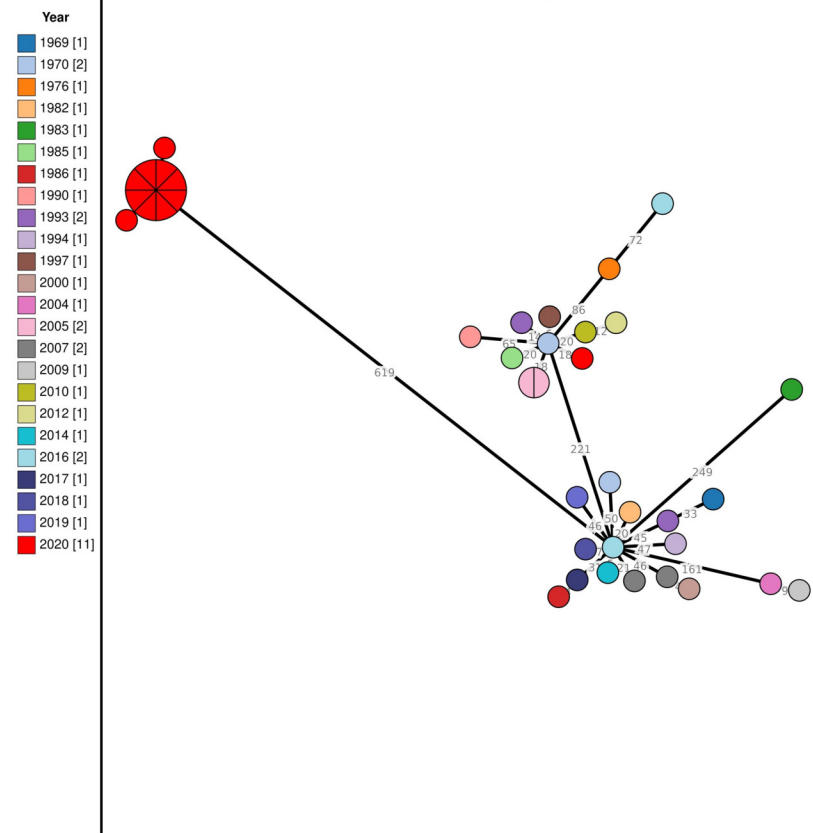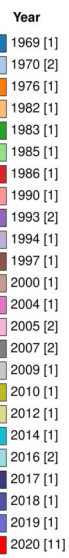

Source: https://www.biorxiv.org/content/10.1101/2022.03.23.485572v1.full.pdf
